# Supplementary material for: A New Propose for Prehistoric Tritonis Lake’s Location based on Apollonius of Rhodes’ description
Source: Copernicus journal article supplement (doi:10.5194/hgss-2022-15), 2023-06-29
Supplement: Supplementary file [file hgss-2022-15-AC2-supplement.pdf]

Dear Dr. Tom Beer

Thank you very much for your prompt answer.

About Fig.6: It is located in the bottom of page 19, but its legend is in the top of page 20.

We have not any disagreement with you in connection with the word 'prove'. In all the text of our work we use very careful phrases. Our position is expressed with clarity in line 622-623: *'Of course, we don't have enough geologic data, such as studied and dated cores from drillings, geomorphologic analyses, or hydrographic data to deduce a safe result. In a study of this kind, there is always a degree of uncertainty'*.

You can see the style of our writing which is in agreement with your position in phrases as:

In the last paragraph of our introduction: *'In this work we will try to answer where exactly Tritonis Lake was located based on the detailed description of Apollonius Argonautica text.'*

Line 318: *'We are forced to accept that the Agronauts arrived to the ancient Tritonis Lake which was located in the cluster of lakes in Siwa Oasis'*.

Line 322: *'Thus, we conclude that these 'traces' must be the water route existing in the 13<sup>th</sup> century BC'*

LINES 344-346: *'We can deduce that in the circumstances in the 13<sup>th</sup> BC, the same percentage of 70% would have significantly more water allowing Argo's sailing. This percentage increases to more than 70%, due to the possibility that the waters were also covering additional areas'*.

LINES 467-469: *'The increased of the water flows in the 13<sup>th</sup> century BC (see in Fig. 2 (right)), forces us, to accept the existence of satisfactory volume of water in the Dabaa formations and in the sabkhas which allowed Argo to sail through them'*.

LINE 555: *'...and probably had water in the 13th century BC'*.

LINE 574-575: *'Because they are large enough, could have had significant amounts of water during the 13<sup>th</sup> century BC, just before the 'dry period'. It is very likely that some of them represent palaeo-lake locations'*.

To avoid any misunderstandings, we are going to delete the word 'prove', as you proposed as follows:

Line 234: *'We have proved...'* changes into *'We have concluded based on the Apollonius text..'*

LINE 370: *'A proof that...'* changes into *'a serious indication that..'*

LINE 391: *'Is also proved by...'* changes into *'is also arises from...'*

LINE 683: *'We have proved that ...'* changes into *'It is known that...'*

The updated text of our paper including your remarks and corrections will be sent to you as soon as possible.

Sincerely yours

Professor Stavros Papamarinopoulos
