# Supplementary material for: A New Propose for Prehistoric Tritonis Lake’s Location based on Apollonius of Rhodes’ description
Source: Copernicus journal article supplement (doi:10.5194/hgss-2022-15), 2023-06-29
Supplement: Supplementary file [file hgss-2022-15-AC4-supplement.pdf]

Dear Prof.T.Beer,

I would like to thank you for your kindness in reading our paper in connection with the Argonauts. We have included all of your remarks in the second version of the paper. Moreover, according to your instructions, we followed your guidance and produced a glossary and a map in the Appendix, showing all the positions of the places related to the southern Argonautic campaign. We also resolved all the issues regarding the bibliography section, as you requested.

The paper is almost ready and prepared to be submitted to the editors. Furthermore, we are going to include interesting remarks from other colleagues who have also read the paper from the preprint file.

Always with health,

Prof. Dr. Stavros Papamarinopoulos

Lead author

HG SS Topical Editor
