# Supplementary material for: A New Propose for Prehistoric Tritonis Lake’s Location based on Apollonius of Rhodes’ description
Source: Copernicus journal article supplement (doi:10.5194/hgss-2022-15), 2023-06-29
Supplement: Supplementary file [file hgss-2022-15-AC9-supplement.pdf]

Dear Professors and Doctors

Tom Beer (reviewer 1)

Richard Cathcart

Charles Finkl

Niki Evelpidou

This email is addressed to you who were kind enough to study our work. Your remarks and the suggested corrections helped us to improve the manuscript.

We consider as necessary to send you the new and updated version of our manuscript. In yellow and green color we tracked the changes based on your way of thinking. If you think that further corrections are needed, we are open to review the text once again. But this procedure should be carried out within a week if possible.

This email is forwarded to both the Editorial team and the Secretary of the journal. We would like to inform you that the publication of our paper is pending for several months due to the fact that no second formal reviewer has been nominated by the editorial team, as the latter, invariably informs us every two weeks!

In spite, of the fact, that the initial paper has been reviewed ‘four times all of by you’, we are wondering if there is a way in order the editorial team to be assisted in nominating the ‘second reviewer’, because it continues attempt unsuccessfully to nominate another reviewer.

With regards

The Authors team:

Prof. S. Papamarinopoulos (University of Patras, Greece), member of the Editorial team of this magazine

Prof. H. Maroukian (University of Athens, Greece)

As. Prof. P. Preka-Pamadema (University of Athens, Greece)

As. Prof. Ch. Tzani (University of Athens, Greece)

K. Kalachanis (Researcher, New York College, Athens, Greece)

G. Sarantitis (Researcher)

D. Theodosopoulos (Researcher)
